# Supplementary material for: AJARAN KONFUSIANISME MENGENAI PENGENDALIAN DIRI YANG MERUPAKAN PEMBENTUKAN BUSHIDO YANG TERCERMIN DALAM KOMIK RUROUNI KENSHIN
Source: Royal Society of Chemistry journal article supplement (doi:10.1039/d2dt03714a), 2007-01-01
Supplement: d2dt03714a1.pdf [file d2dt03714a1.pdf]

## **Electronic Supplementary Information**

### **A Multi-cation Responsive Ni(II)-Supramolecular Metallogel Mimics as Molecular Keypad Lock *via* Reversible Fluorescence Switching**

Vaishali Singh<sup>a</sup>, Shubhra Kala<sup>b</sup>, Tanmay Rom<sup>c</sup>, Avijit Kumar Paul<sup>c</sup> and Rampal Pandey<sup>\*a</sup>

<sup>a</sup>National Institute of Technology Uttarakhand, Srinagar (Garhwal)-246174, INDIA.

<sup>b</sup>Hemwati Nandan Bahuguna Garhwal University, Srinagar (Garhwal)-246174, INDIA.

<sup>c</sup>National Institute of Technology Kurukshetra, Kurukshetra -136119, INDIA.

**Preparation of [Zn(C<sub>21</sub>H<sub>29</sub>N<sub>3</sub>O<sub>2</sub>)] (2).** Complex **2** was prepared following above synthetic procedure adopted for **1** to obtain orange precipitate. The grown single crystals immediately lose their transparency and become inappropriate for diffraction. Yield (1.1 g; 59.3%) Anal Calcd. [C<sub>42</sub>H<sub>56</sub>N<sub>6</sub>ZnO<sub>2</sub>]: C 67.96; H 7.60; N 11.32 %; Found: C 67.76; H 7.67; N 11.24 %; FT-IR (cm<sup>-1</sup>): 2968, 1610, 1567, 1490, 1346, 1203, 1132, 823, 778. <sup>1</sup>H-NMR (CDCl<sub>3</sub>, 400 MHz, δ<sub>H</sub>, ppm): 8.47 (s, 2H, -CH=N-), 7.57-7.47 (s, 2H, Ar), 7.42-7.21 (d, 4H, Ar), 6.92-6.71(d, 4H, Ar), 6.47-6.40(d, 2H, Ar) 6.32(d, 2H, Ar), 3.39-3.35 (m, 16H, -CH<sub>2</sub>), 1.97-1.24 (m, 24H, -CH<sub>3</sub>) <sup>13</sup>C NMR (CDCl<sub>3</sub>, 125 MHz, δ<sub>C</sub>, ppm): 161.82, 160.47, 147.97, 136.16, 80.52, 72.11, 69.76, 69.52. ESI-MS (m/z) for C<sub>42</sub>H<sub>56</sub>N<sub>6</sub>ZnO<sub>2</sub>: Calcd. [M<sup>+</sup>] 740.3756; found [M+H]<sup>+</sup>: 741.3806.

**Spectral analysis of complex 2.** <sup>1</sup>H NMR spectrum of complex **2** displayed complete vanishing of phenolic -OH peak of **HL** along with significant down-field shifts in the -CH=N- (Δδ, 0.07 ppm. Other aromatic and aliphatic resonances were also deshielded in **2** relative to that of **HL** (Fig. S2, ESI<sup>†</sup>). The Electrospray ionization-mass spectrometry (ESI-MS) also strongly suggested the formation of metal complex **2** by exhibiting abundant molecular ion peaks [M+H]<sup>+</sup> at 741.3806 (Fig. S3, ESI<sup>†</sup>) thereby supporting the 2:1 (L<sup>-</sup> : M) stoichiometric complexation between ligand and metal ion. Furthermore, formation of complex **2** was elucidated with the help of FT-IR spectral analysis in the solid-state. Several symmetric and asymmetric vibrations appeared in the FT-IR spectra for **2**. The FT-IR spectrum for **HL** shows vibration at 1615 cm<sup>-1</sup> that may be ascribed to the azomethine (>C=N-) stretching<sup>23</sup> which is considerably shifted toward low frequency region in the complex **2** to appear at 1608 cm<sup>-1</sup> (Fig. S4, ESI<sup>†</sup>).

**Table S1**  
structural parameters of

| <b>Structural parameter</b>                                                                                                                                                                                   | <b>HL</b>                                         | <b>Complex (1)</b>                                               |
|---------------------------------------------------------------------------------------------------------------------------------------------------------------------------------------------------------------|---------------------------------------------------|------------------------------------------------------------------|
| Empirical formula                                                                                                                                                                                             | C <sub>21</sub> H <sub>29</sub> N <sub>3</sub> O  | C <sub>42</sub> H <sub>56</sub> N <sub>6</sub> O <sub>2</sub> Ni |
| Formula weight                                                                                                                                                                                                | 339.47                                            | 735.63                                                           |
| T(K)                                                                                                                                                                                                          | 295                                               | 296                                                              |
| $\lambda$ (Mo K $\alpha$ ) (Å)                                                                                                                                                                                | 0.71073                                           | 0.71073                                                          |
| Crystal system                                                                                                                                                                                                | Orthorhombic                                      | Triclinic                                                        |
| Space group                                                                                                                                                                                                   | <i>P</i> 212121                                   | <i>P</i> -1 (No. 2)                                              |
| a (Å)                                                                                                                                                                                                         | 8.1986(4)                                         | 9.0649(4)                                                        |
| b (Å)                                                                                                                                                                                                         | 9.7128(4)                                         | 9.0718(4)                                                        |
| c (Å)                                                                                                                                                                                                         | 24.4172(12)                                       | 12.9046(6)                                                       |
| $\alpha$ (deg.)                                                                                                                                                                                               |                                                   | 72.800(1)                                                        |
| $\beta$ (deg.)                                                                                                                                                                                                |                                                   | 75.386(1)                                                        |
| $\gamma$ (deg.)                                                                                                                                                                                               |                                                   | 73.838(2)                                                        |
| V (Å <sup>3</sup> )                                                                                                                                                                                           | 1944.38(16)                                       | 956.83(8)                                                        |
| Z                                                                                                                                                                                                             | 4                                                 | 1                                                                |
| D (g cm <sup>-3</sup> )                                                                                                                                                                                       | 1.160                                             | 1.277                                                            |
| $\mu$ (min <sup>-1</sup> )                                                                                                                                                                                    | 0.07                                              | 0.551                                                            |
| F (000)                                                                                                                                                                                                       | 736                                               | 394                                                              |
| $\theta$ range (deg.)                                                                                                                                                                                         | 2.3 to 25.4                                       | 1.681 to 25.000                                                  |
| Reflections collected                                                                                                                                                                                         | 29,557                                            | 3319                                                             |
| Unique data                                                                                                                                                                                                   | 3556                                              | 3027                                                             |
| R indexes [ I > 2 $\sigma$ (I)]                                                                                                                                                                               |                                                   | R <sub>1</sub> = 0.0306<br>wR <sub>2</sub> = 0.0801              |
| R indexes (all data)                                                                                                                                                                                          | R <sub>1</sub> = 0.064<br>wR <sub>2</sub> = 0.205 | R <sub>1</sub> = 0.0372<br>wR <sub>2</sub> = 0.0909              |
| GOF on F <sup>2</sup>                                                                                                                                                                                         | 1.07                                              | 1.126                                                            |
| $\sum \left   F_o  -  F_c  \right  / \sum  F_o  \cdot wR_2 = \{ \sum [w (F_o^2 - F_c^2)] / \sum [w (F_o^2)^2] \}^{1/2}$ . Empirical formula and formula weight of all the compounds are given from CIF files. |                                                   |                                                                  |

Crystal data and refinement  
HL and 1.

**Table S2** Selected bond distances (Å) and angles (°) marked in 1.

| <b>Bond</b> | <b>Length (Å)</b>   |
|-------------|---------------------|
| Ni(1)—O(1)  | 1.838(1)            |
| Ni(1)—N(2)  | 1.913(1)            |
| C(2)—N(1)   | 1.453(2)            |
| C(3)—N(1)   | 1.450(3)            |
| C(5)—N(1)   | 1.383(2)            |
| C(8)—N(2)   | 1.441(2)            |
| C(11)—N(2)  | 1.294(2)            |
| C(15)—N(3)  | 1.376(2)            |
| C(19)—N(3)  | 1.460(3)            |
| C(20)—N(3)  | 1.454(3)            |
| <b>Bond</b> | <b>Angle (deg.)</b> |

|                  |           |
|------------------|-----------|
| O(1)—Ni(1)—O(1)  | 180.00(6) |
| O(1)—Ni(1)—N(2)  | 87.16(5)  |
| C(3)—N(1)—C(2)   | 117.57(1) |
| C(5)—N(1)—C(2)   | 120.80(1) |
| C(5)—N(1)—C(3)   | 121.05(1) |
| C(11)—N(2)—C(8)  | 116.04(1) |
| C(15)—N(3)—C(19) | 121.73(1) |
| C(15)—N(3)—C(20) | 121.03(1) |
| C(20)—N(3)—C(19) | 117.12(1) |

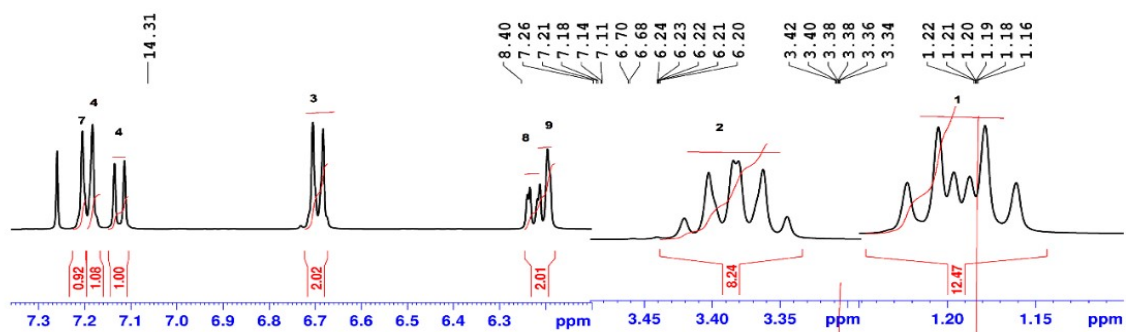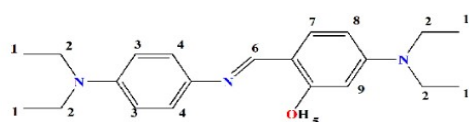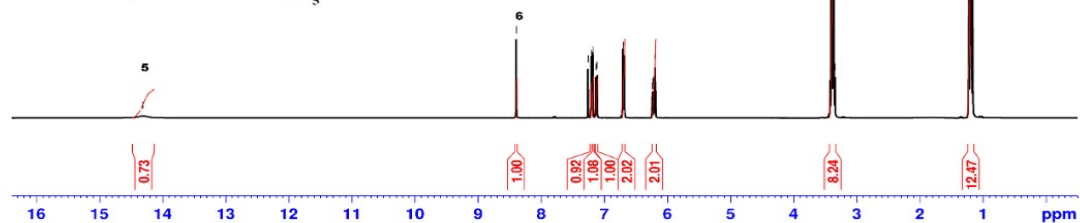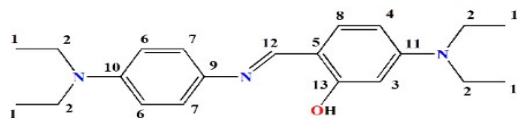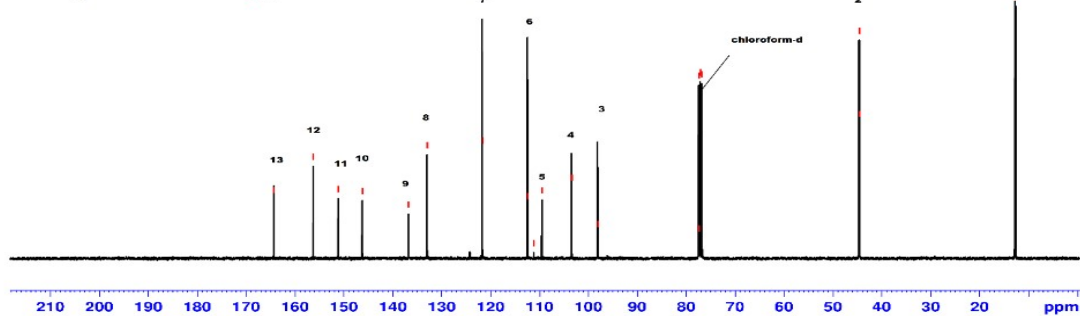

**Fig. S1**  $^1\text{H}$ -NMR and  $^{13}\text{C}$ -NMR Spectra of **HL**.

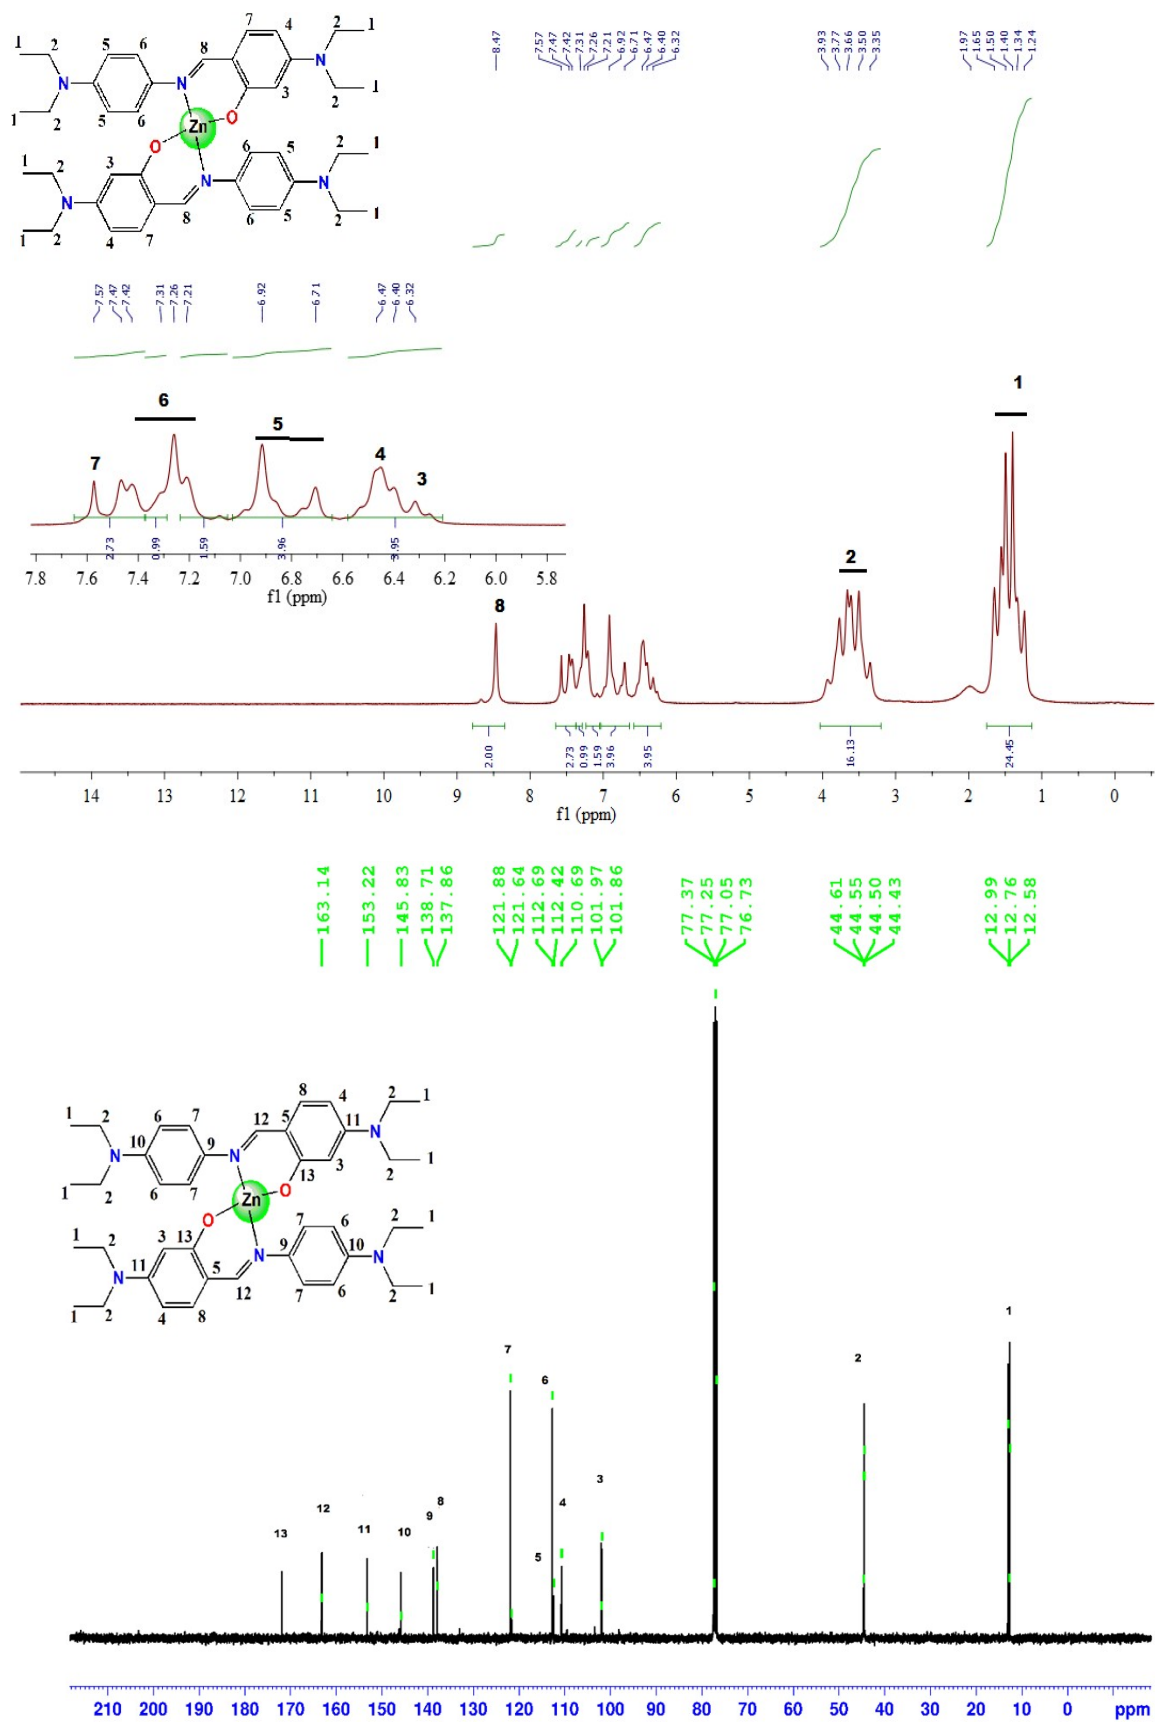

Fig. S2  $^1\text{H-NMR}$  and  $^{13}\text{C-NMR}$  spectra of **2**.

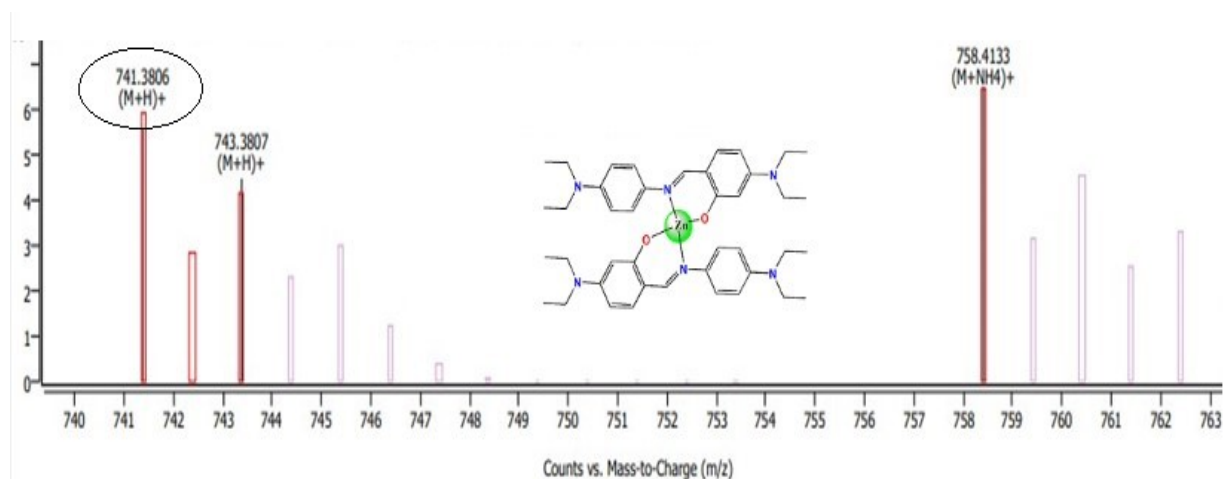

Fig. S3 ESI-MS spectrum of **2**.

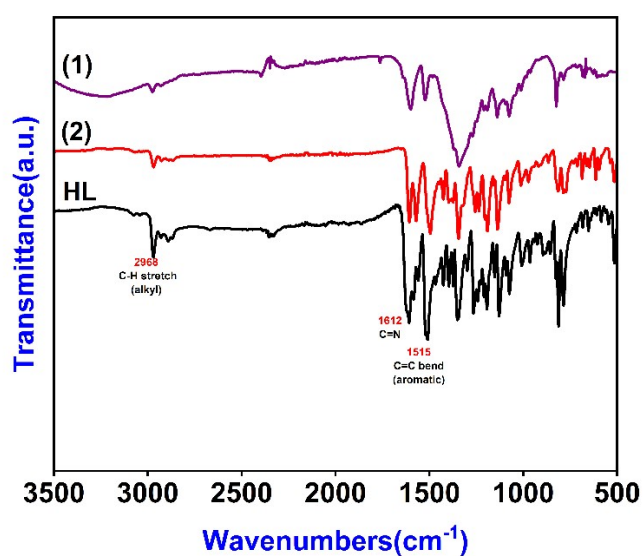

Fig. S4 FT-IR spectra of **HL** and **1-2**.

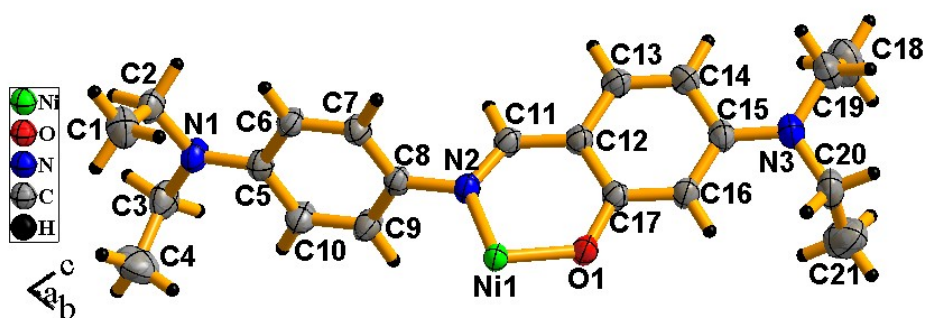

Fig. S5 The asymmetric unit of **1** with 50% probability displacement ellipsoid.

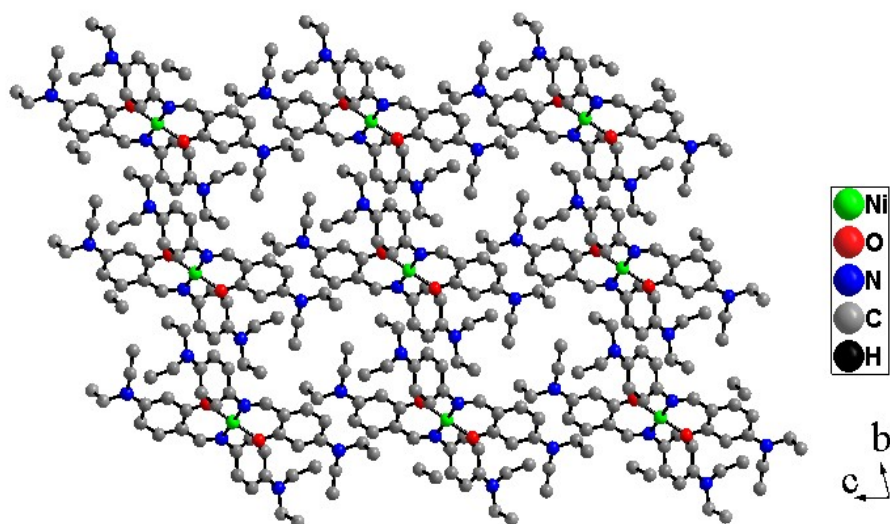

Fig. S6 The overall packing structure of 1 in *bc* plane.

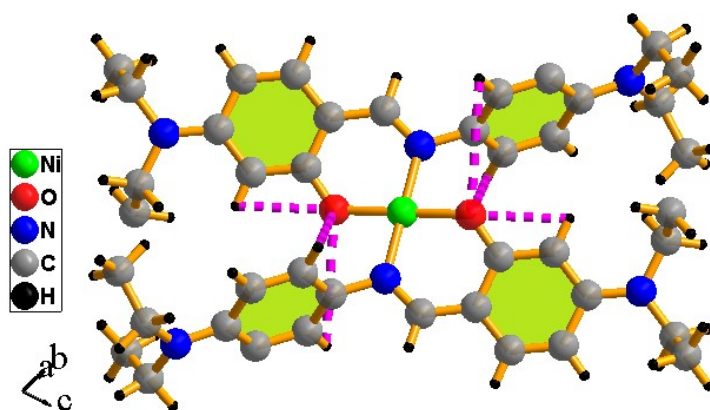

Fig. S7 The observed intra-molecular hydrogen bonding interaction in structure of 1.

| S.No. | Solvent                   | Solubility        |
|-------|---------------------------|-------------------|
| 1     | Methanol                  | Slightly soluble  |
| 2     | Ethanol                   | Slightly soluble  |
| 3     | Acetonitrile              | Partially soluble |
| 4     | Dimethyl sulfoxide        | Partially soluble |
| 5     | <b>Dimethyl formamide</b> | <b>Soluble</b>    |
| 6     | <b>Acetone</b>            | <b>Soluble</b>    |
| 7     | <b>Dichloromethane</b>    | <b>Soluble</b>    |
| 8     | <b>Chloroform</b>         | <b>Soluble</b>    |
| 9     | <b>Tetrahydrofuran</b>    | <b>Soluble</b>    |
| 10    | Diethyl ether             | Insoluble         |
| 11    | Hexane                    | Insoluble         |

Table S3 Solubility of HL.

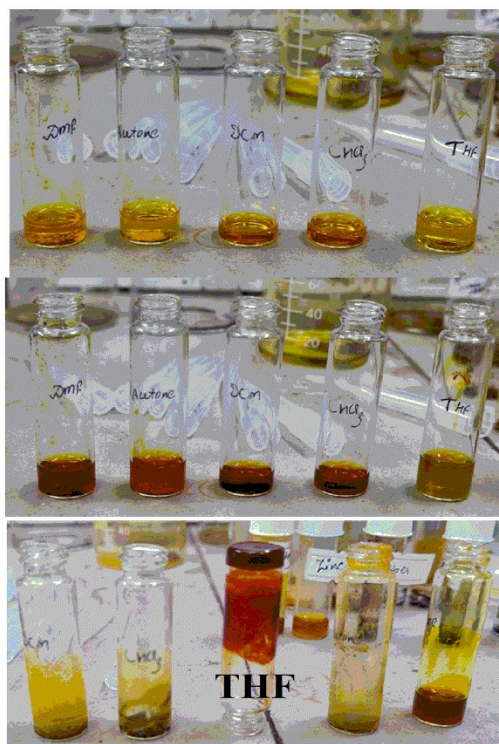

**Fig. S8** Photograph of instantaneous gel material in the presence of THF solvent.

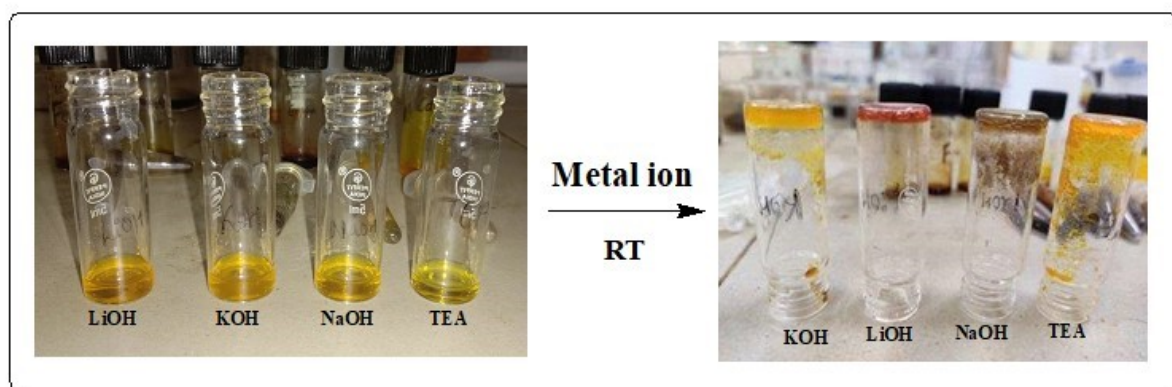

**Fig. S9** Photograph of instantaneous gel material with different base (MeOH).

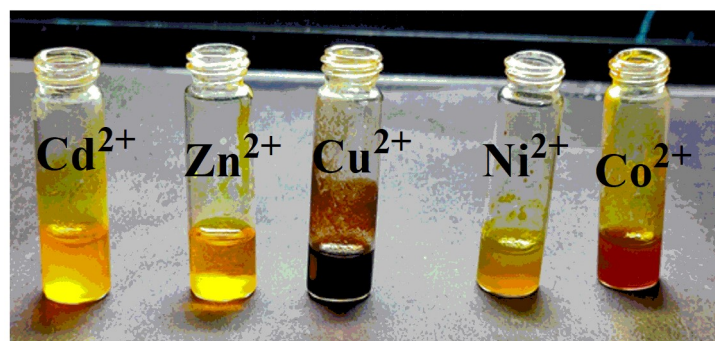

**Fig. S10** To know the ability of gelation with a stoichiometry (2:1) of HL with Ni<sup>2+</sup> metal ion.



| S.No. | Ligand (0.1 mmol in THF) | Base (0.2 mmol TEA) | Metal nitrates (0.1 mmol in MeOH) | Instant Observation |
|-------|--------------------------|---------------------|-----------------------------------|---------------------|
| 1     | 1mL                      | 32 $\mu$ L          | Cd <sup>2+</sup> =30 mg           | PG                  |
| 2     | 1mL                      | 32 $\mu$ L          | Zn <sup>2+</sup> =32 mg           | P                   |
| 3     | 1mL                      | 32 $\mu$ L          | Cu <sup>2+</sup> =23 mg           | P                   |
| 4     | 1mL                      | 32 $\mu$ L          | Ni <sup>2+</sup> =30 mg           | G                   |
| 5     | 1mL                      | 32 $\mu$ L          | Co <sup>2+</sup> =30 mg           | P                   |

S=Solution, P=Precipitate, PG=Partially Gel, G=Gel

**Table S4** The tabulated represents the gelation ability of the **HL** with stoichiometry (1:1).

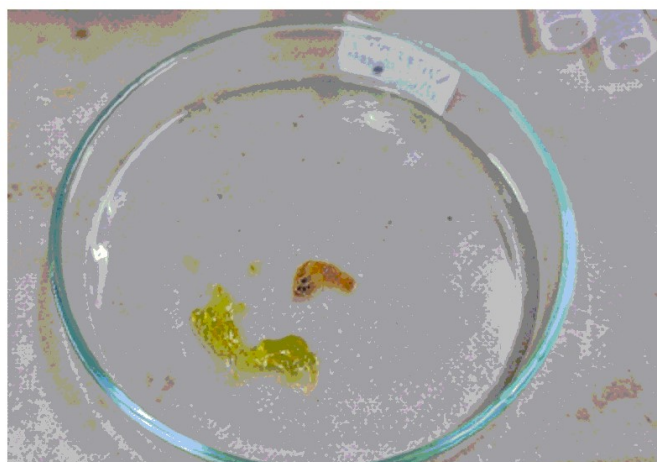

**Fig. S11** Image of xerogel **MG** on increasing temperature upto 50°C with compared freshly **MG**.

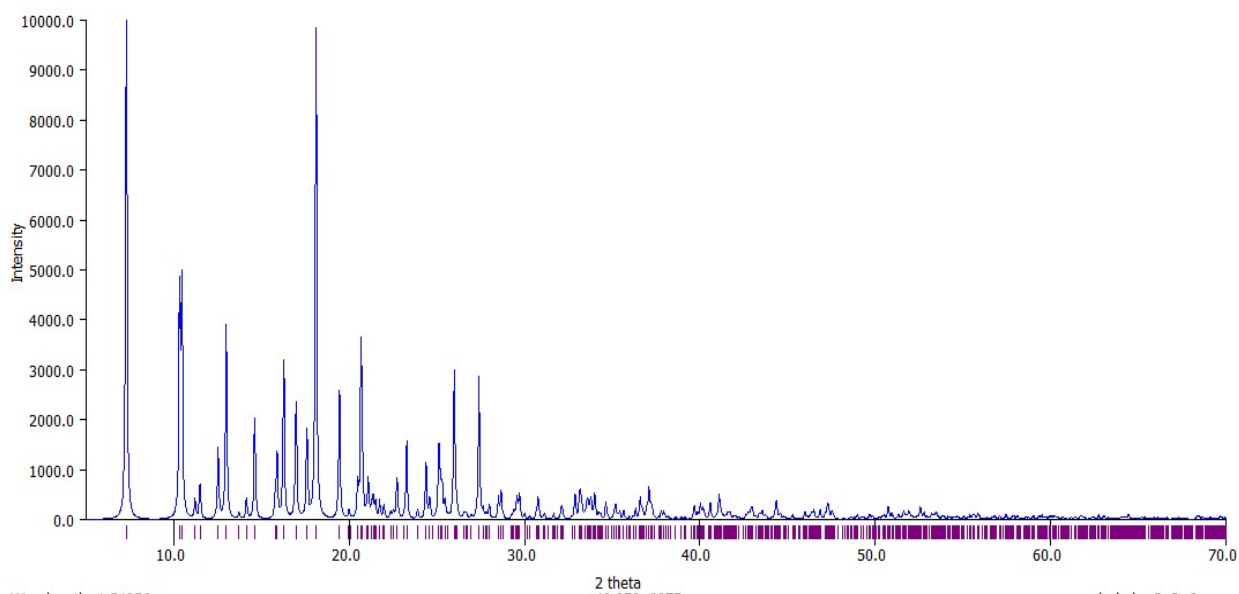

**Fig. S12** PXRD pattern of the complex **1**.

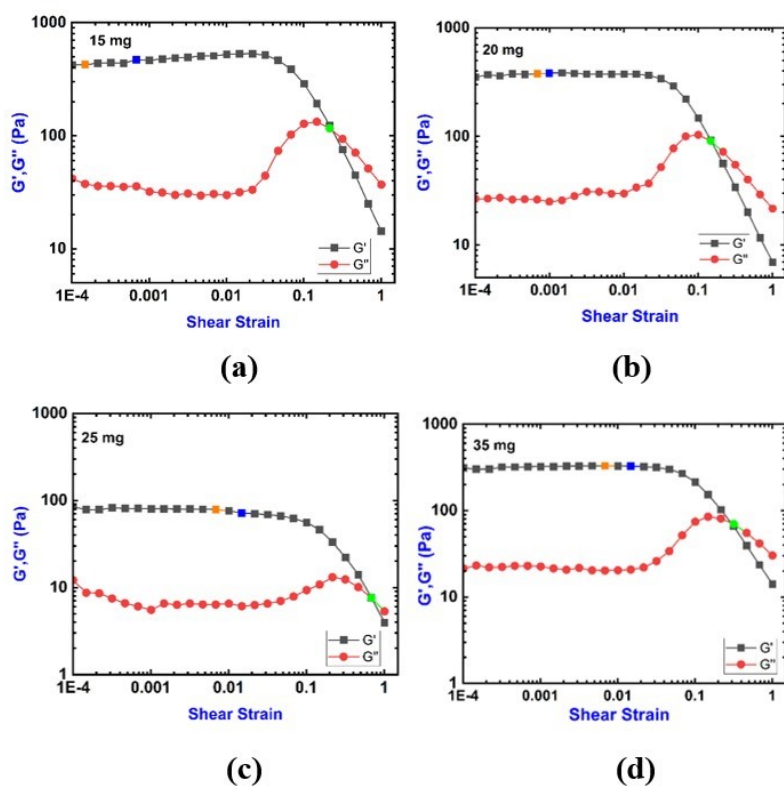

**Fig. S13** Amplitude sweeps measurements of **MG** with shear strain 0.01% at different concentration of  $\text{Ni}^{2+}$  ion (a)15 mg (b) 20 mg (c) 25 mg (d) 35 mg.

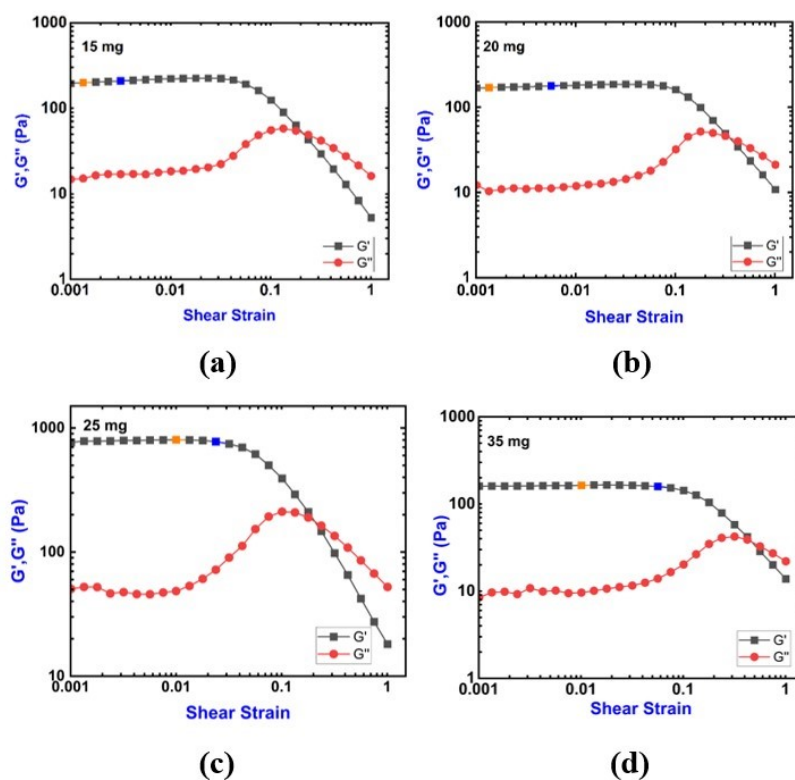

**Fig. S14** Amplitude sweeps measurements of **MG** with shear strain 0.1% at different concentration of  $\text{Ni}^{2+}$  ion (a) 15 mg (b) 20 mg (c) 25 mg (d) 35 mg.

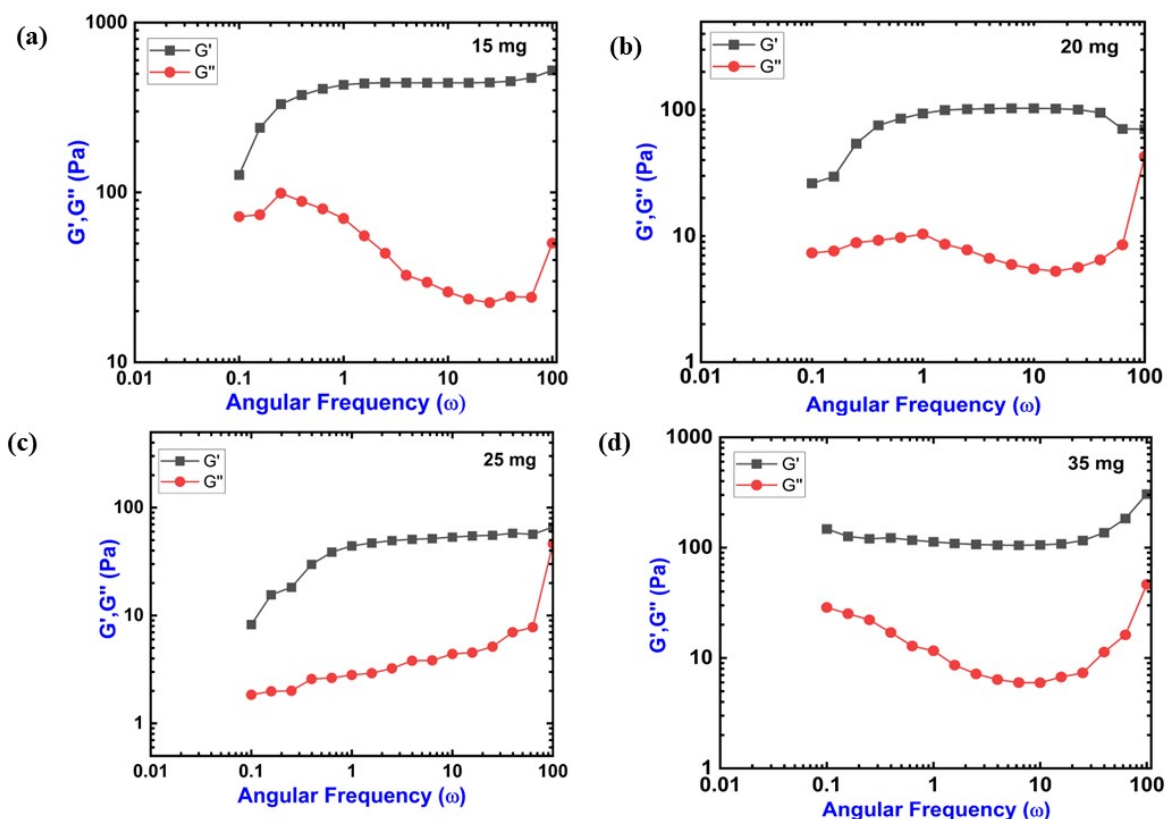

**Fig. S15** Frequency sweeps measurements of **MG** with constant strain 0.5% at different concentration of  $\text{Ni}^{2+}$  ion (a) 15 mg (b) 20 mg (c) 25 mg (d) 35 mg.

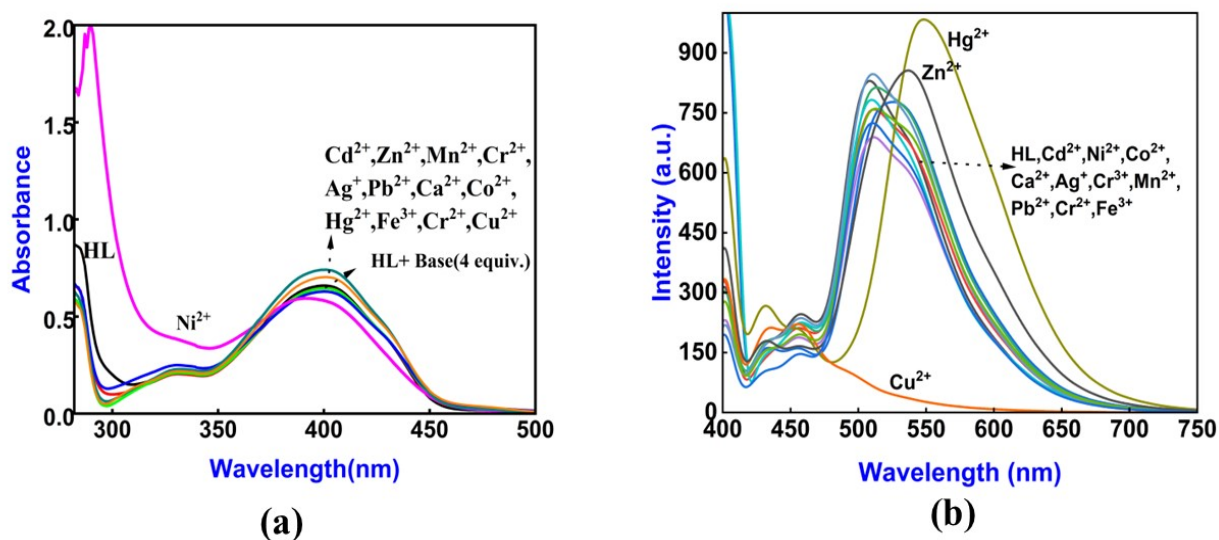

**Fig. S16** (a) Absorption spectra in presence of TEA base (100mM, MeOH) with metal nitrates (100 mM, MeOH) and (b) Emission spectra of **HL**(10  $\mu\text{M}$ , THF) absence of base with metal nitrates (100 mM, MeOH).

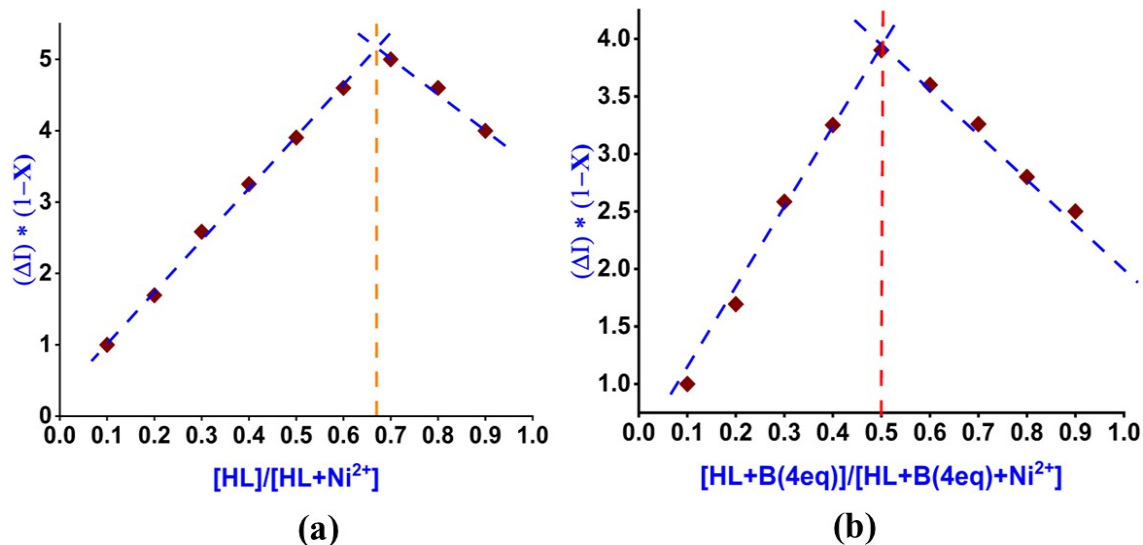

**Fig. S17** (a) Job's plot analysis showing 2:1 stoichiometry between **HL** (10  $\mu\text{M}$ , THF) and  $\text{Ni}^{2+}$  ion (10  $\mu\text{M}$ , MeOH) without base (b) Job's plot analysis showing 1:1 stoichiometric between **HL** (10  $\mu\text{M}$ , THF) and  $\text{Ni}^{2+}$  metal ion (10  $\mu\text{M}$ , MeOH) with TEA (4equiv., 10  $\mu\text{M}$ , MeOH).

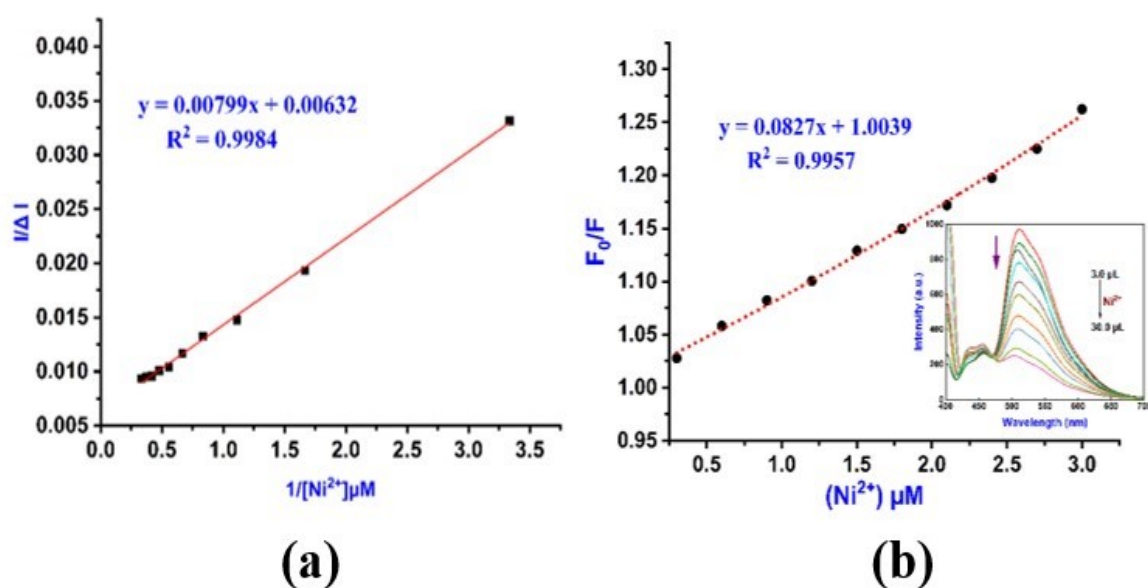

**Fig. S18** (a) Association constant by B-H plot for 1:1 stoichiometry for **MG** between  $\text{Ni}^{2+}$  (3  $\mu\text{L}$ -30  $\mu\text{L}$ ) and **HL** (10  $\mu\text{M}$ , THF) (b) Stern-Volmer plot to determine fluorescence quenching of  $\text{Ni}^{2+}$  (3  $\mu\text{L}$ -30  $\mu\text{L}$ ) with **HL** (10  $\mu\text{M}$ , THF)

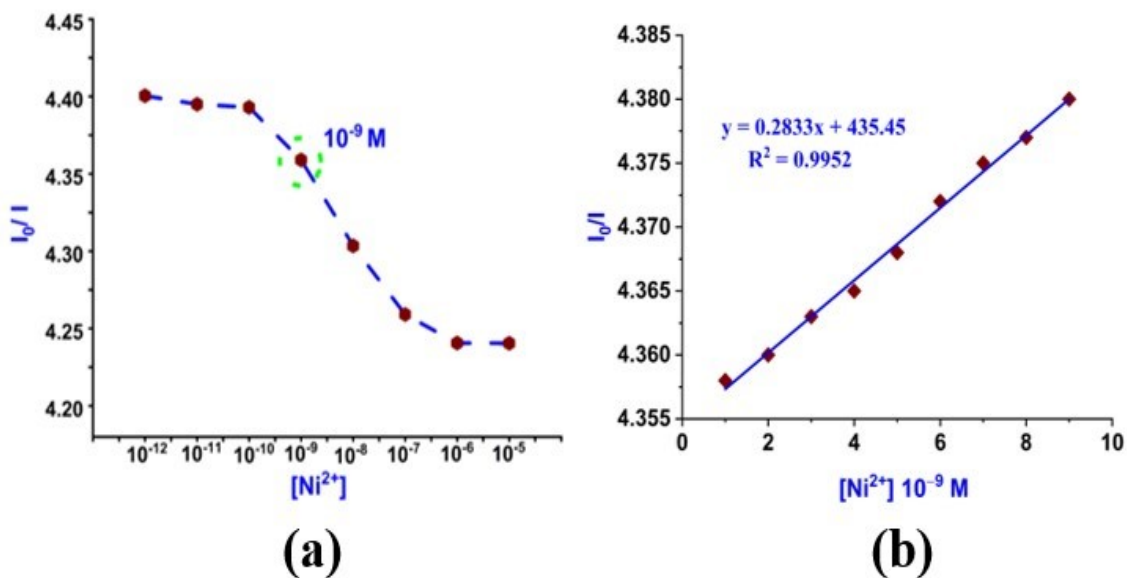

**Fig. S19** (a) Sensitivity and (b) linearity plots to determine the limit of detection (LoD) interaction of  $Ni^{2+}$  with **HL** ( $10 \mu\text{M}$ , THF) employing the fluorescence techniques.

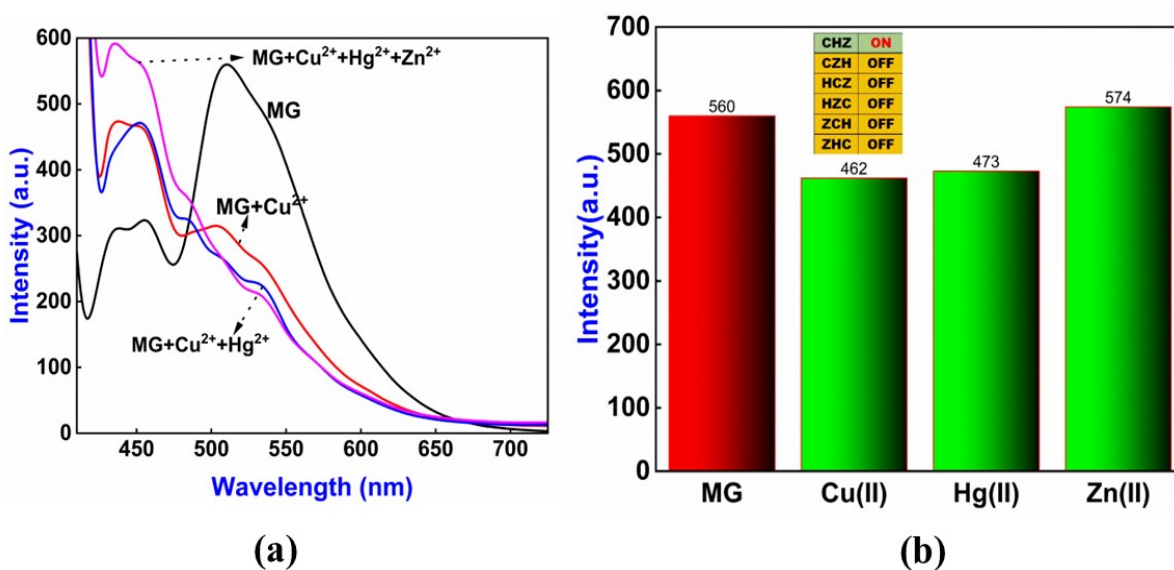

**Fig. S20** Reversible emission switching behaviour of **MG** ( $10 \mu\text{M}$ , THF) with  $Cu^{2+}$ ,  $Hg^{2+}$  and  $Zn^{2+}$  ions for other combinations than ZCH and ZHC (slit width  $7.5 \text{ nm}$ ).

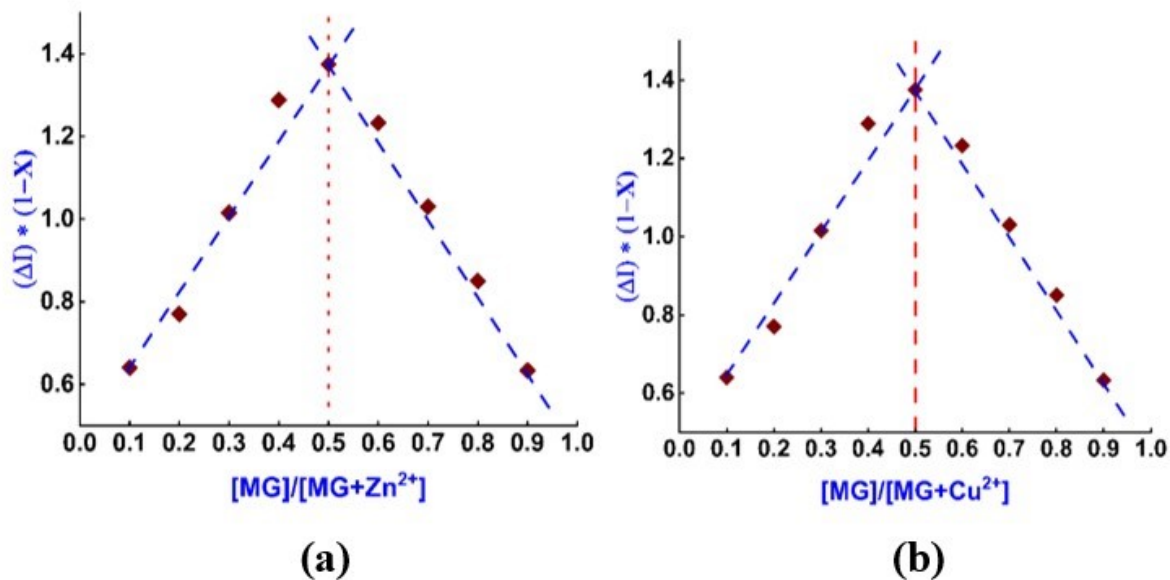

**Fig. S21** Job's plot analysis showing 1:1 stoichiometric between **MG** (10  $\mu$ M, THF) (a)  $Zn^{2+}$  and (b)  $Cu^{2+}$ .

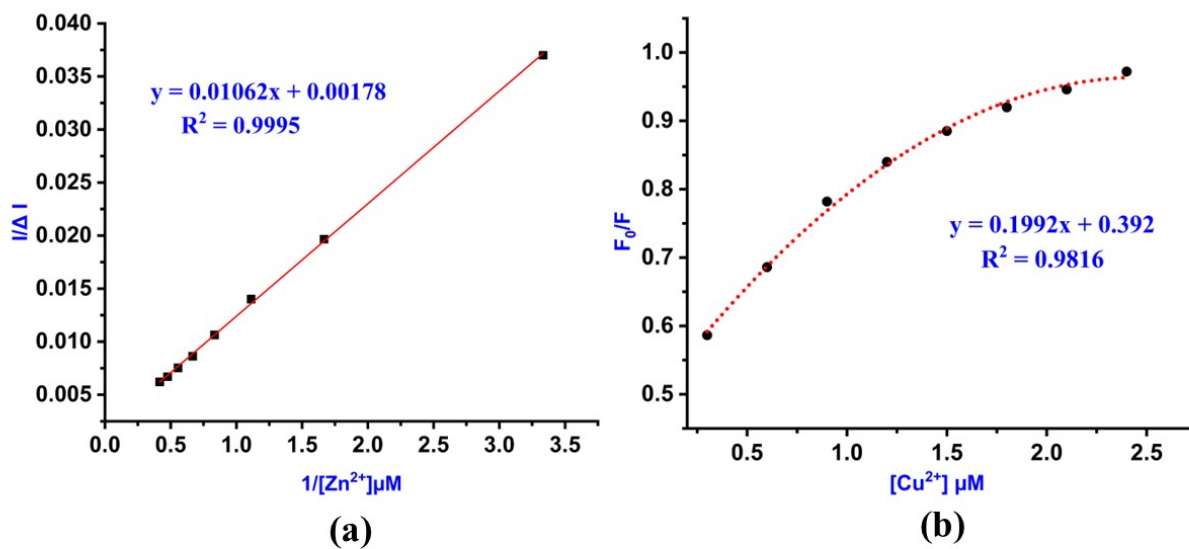

**Fig. S22** (a) B-H plot for 1:1 stoichiometry for enhancement mechanism between **MG** and  $Zn^{2+}$  and (b) Stern-Volmer plot to determine fluorescence quenching of  $Cu^{2+}$  with **MG**.

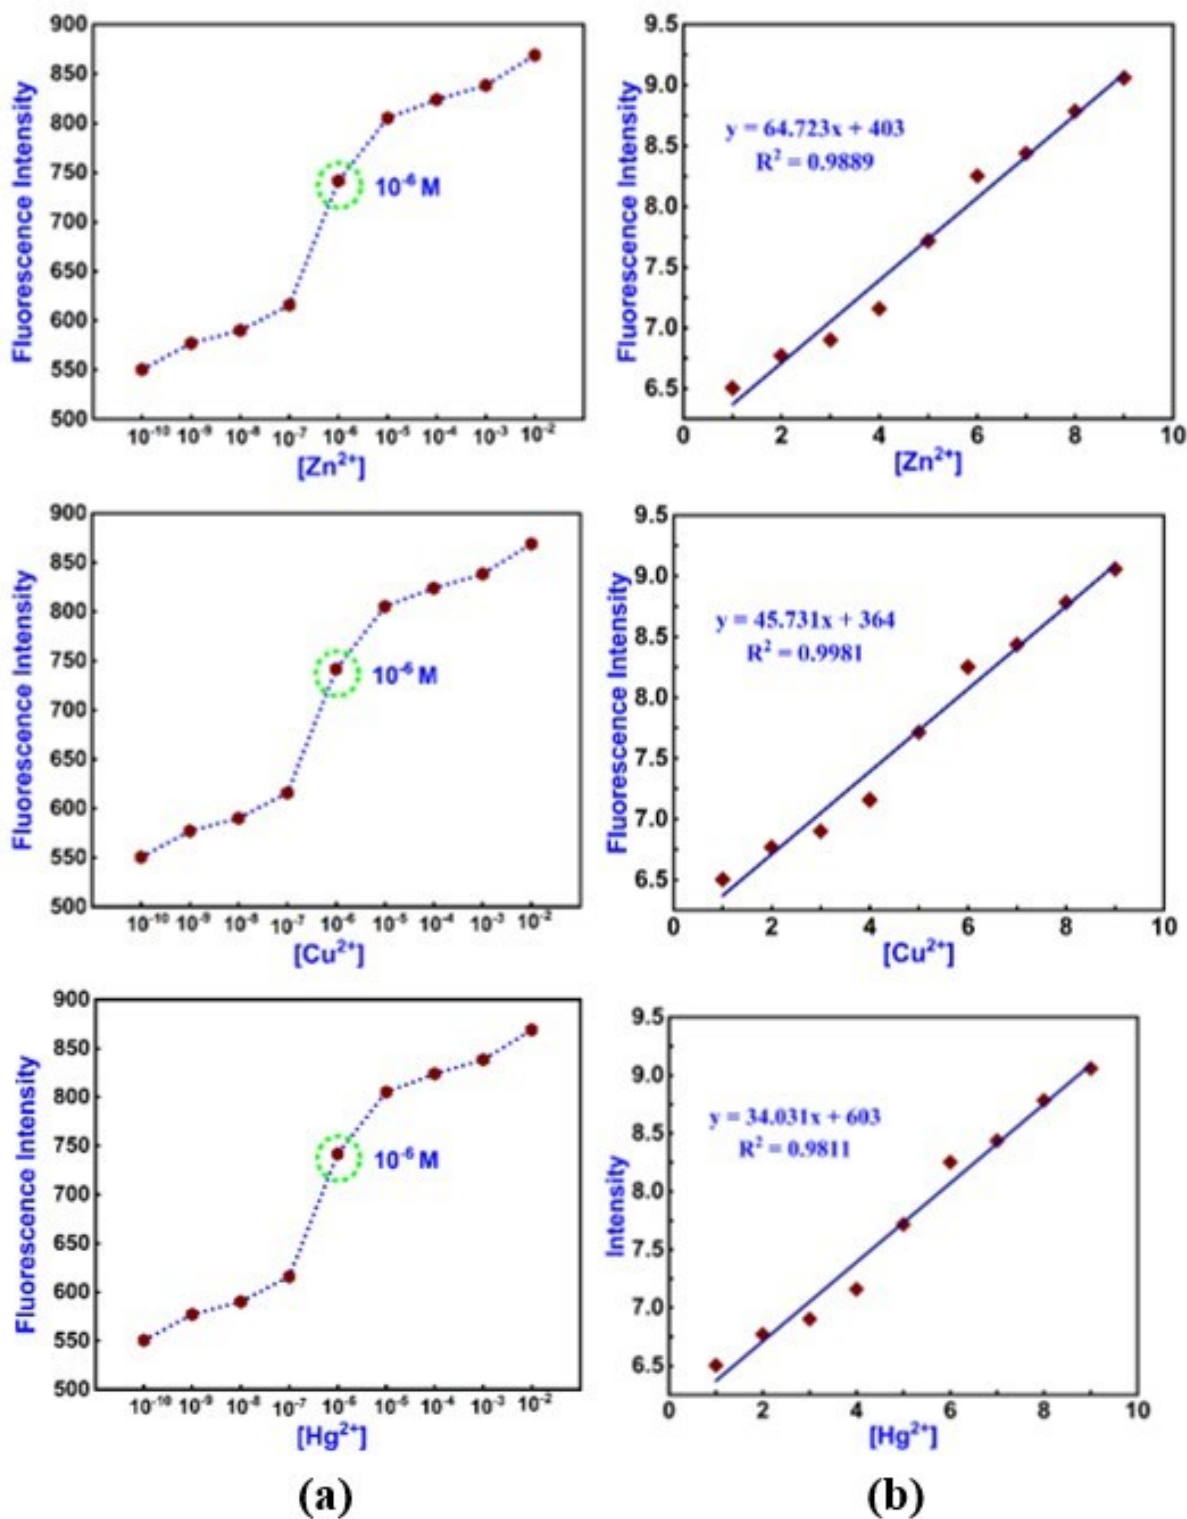

**Fig. S23** (a) Sensitivity and (b) linearity plots to determine the limit of detection (LoD) interaction of detected metal ions ( $M^{2+}=Zn^{2+}$ ,  $Cu^{2+}$  and  $Hg^{2+}$ ) with MG (10  $\mu$ M, THF) employing the fluorescence techniques.

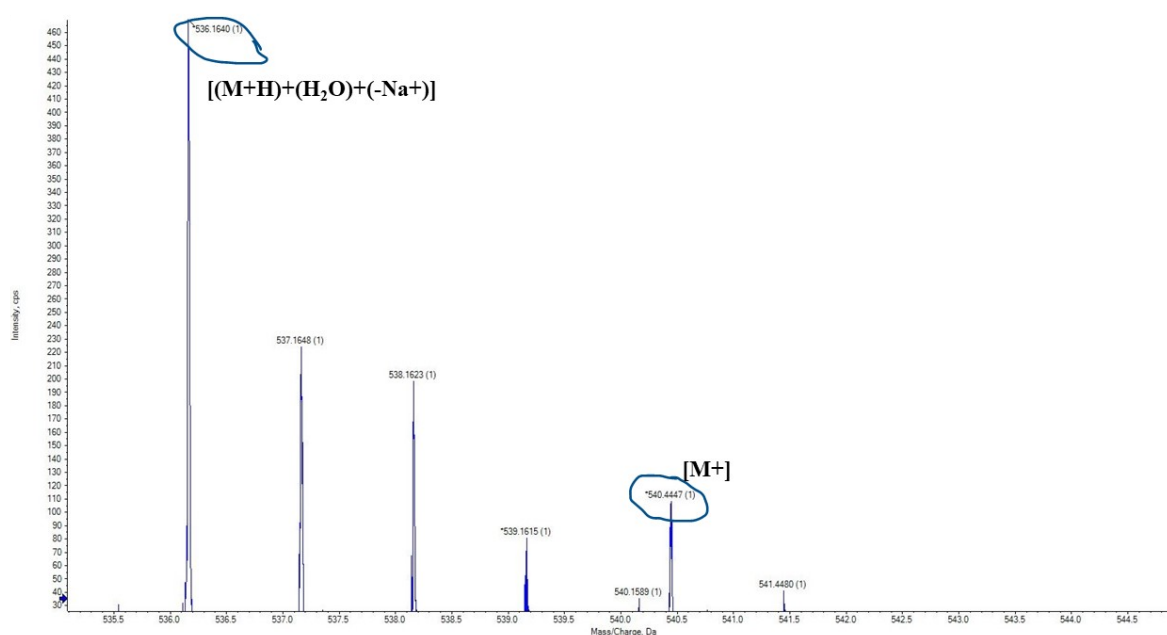

**Fig. S24** HRMS spectrum of MG+Zn<sup>2+</sup>.

The Mass spectra have been presented as below:

1. C<sub>42</sub>H<sub>56</sub>N<sub>6</sub>NiO<sub>2</sub> (Complex 1)

Experimental exact mass: 734.3803 Theoretical exact Mass: 734.3818

*m/e*: 734.3818 (100.0%), 735.3852 (45.4%), 736.3773 (38.5%), 737.3806 (17.5%), 736.3885 (10.1%), 738.3748 (5.3%), 738.3840 (3.9%), 739.3782 (2.4%), 735.3789 (2.2%), 737.3775 (1.7%), 737.3919 (1.5%), 740.3744 (1.4%), 736.3822 (1.0%).

(1a) Experimental Mass Spectrum of C<sub>42</sub>H<sub>56</sub>N<sub>6</sub>O<sub>2</sub>Ni (Complex 1)

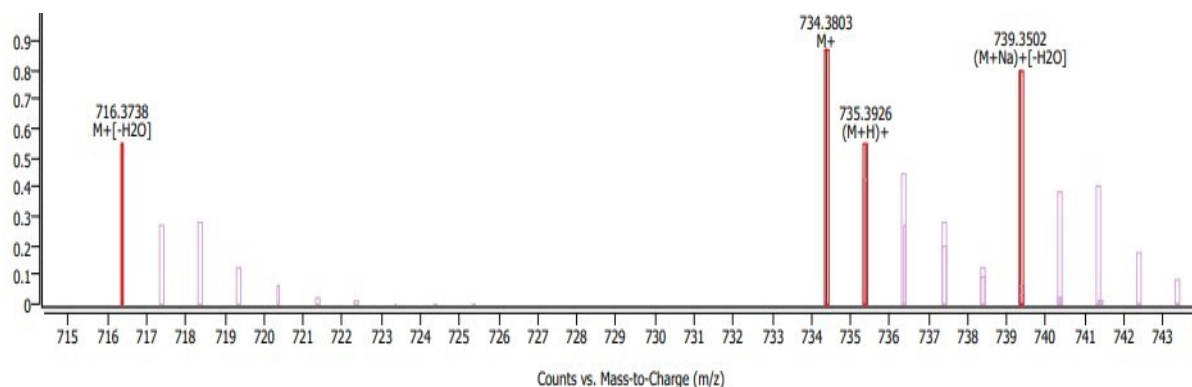

(1b) Theoretical Mass Spectrum of C<sub>42</sub>H<sub>56</sub>N<sub>6</sub>O<sub>2</sub>Ni (Complex 1) with isotopic distribution pattern

Low-resolution



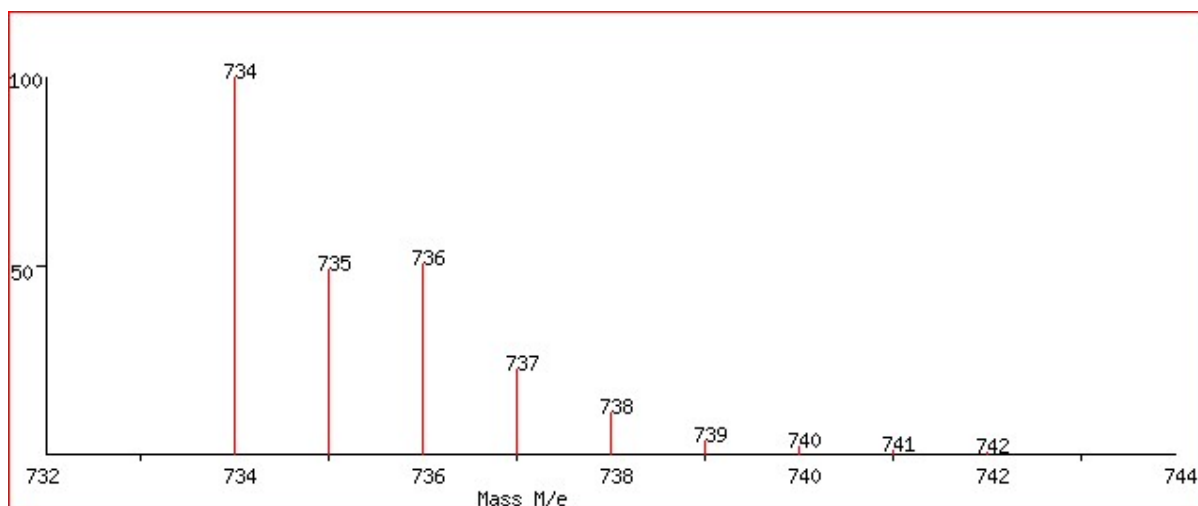

High-resolution

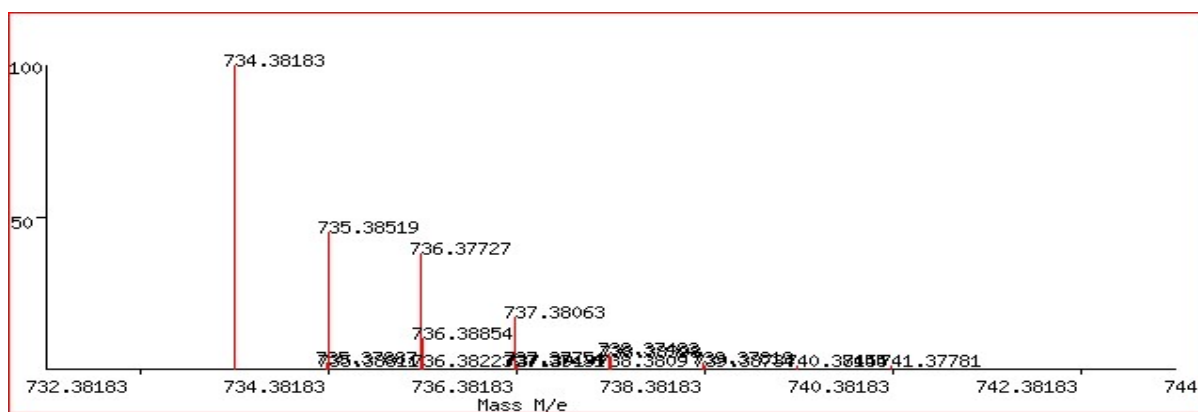

## 2. $C_{21}H_{30}N_4NiO_5$ (MG)

Experimental exact mass: 476.1590 Theoretical exact Mass: 476.157

m/e: 476.1570 (100.0%), 478.1524 (38.5%), 477.1603 (22.7%), 479.1558 (8.7%), 480.1500 (5.3%), 478.1637 (2.5%), 479.1527 (1.7%), 477.1540 (1.5%), 482.1496 (1.4%), 481.1533 (1.2%), 478.1612 (1.0%).

### (2a) Experimental Mass Spectrum of $C_{21}H_{30}N_4O_5Ni$ (MG)

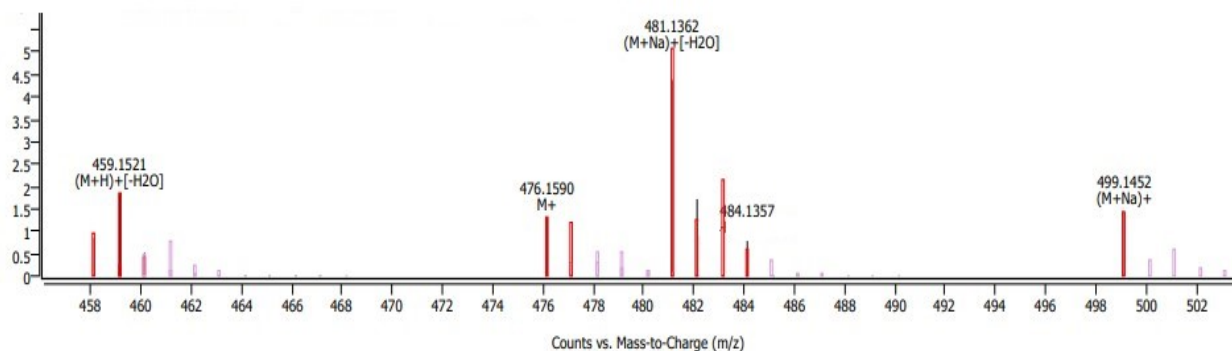

(2b) Theoretical Mass Spectrum of  $C_{21}H_{30}N_4O_5Ni$  (**MG**) with isotopic distribution pattern

Low-resolution.

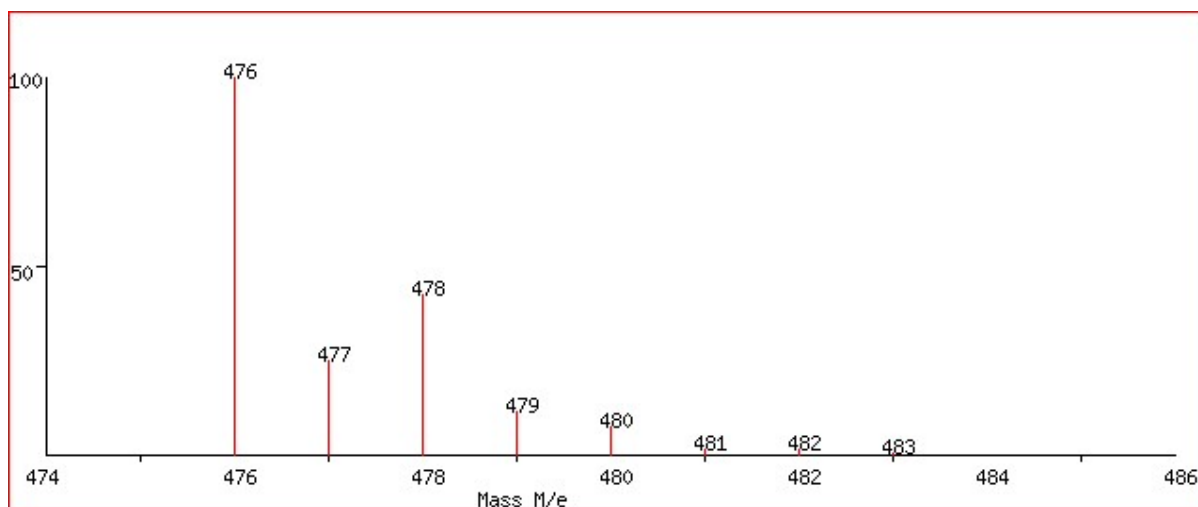

High-resolution

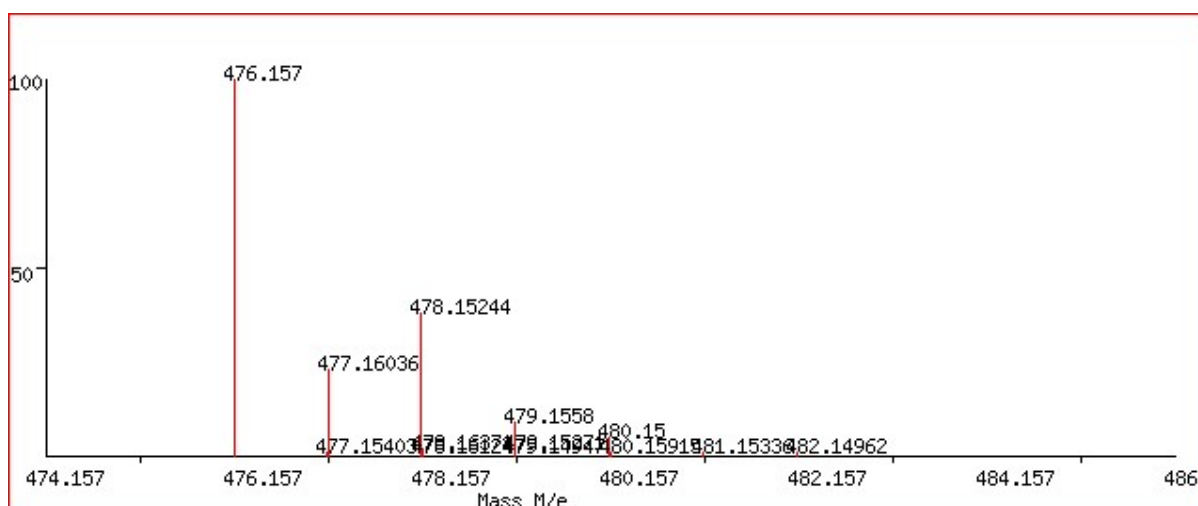

3.  $C_{42}H_{56}N_6O_2Zn$  (Complex 2)

Experimental exact mass: 741.3806 Theoretical exact mass: 740.3756

m/e: 740.3756 (100.0%), 742.3725 (57.4%), 741.3790 (45.4%), 744.3713 (38.6%), 743.3759 (26.1%), 745.3747 (17.5%), 742.3823 (10.1%), 743.3736 (8.4%), 744.3792 (5.8%), 746.3780 (3.9%), 744.3770 (3.8%), 741.3727 (2.2%), 743.3857 (1.5%), 746.3718 (1.3%), 743.3695 (1.3%), 742.3760 (1.0%).

(3a) Experimental Mass Spectrum of  $C_{42}H_{56}N_6O_2Zn$  (Complex 2)

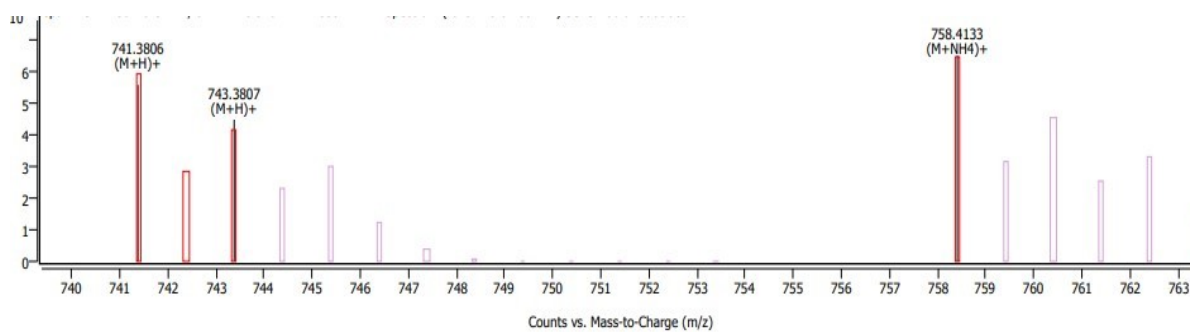

(3b) Theoretical Mass Spectrum of  $C_{42}H_{56}N_6O_2Zn$  (Complex 2) with isotopic distribution pattern

Low-resolution.

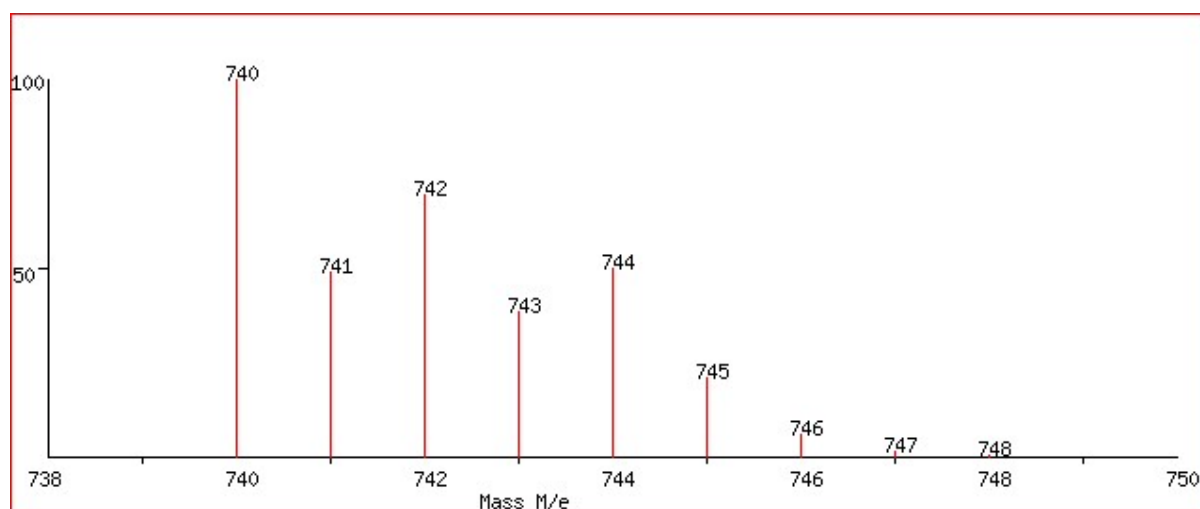

High-resolution.

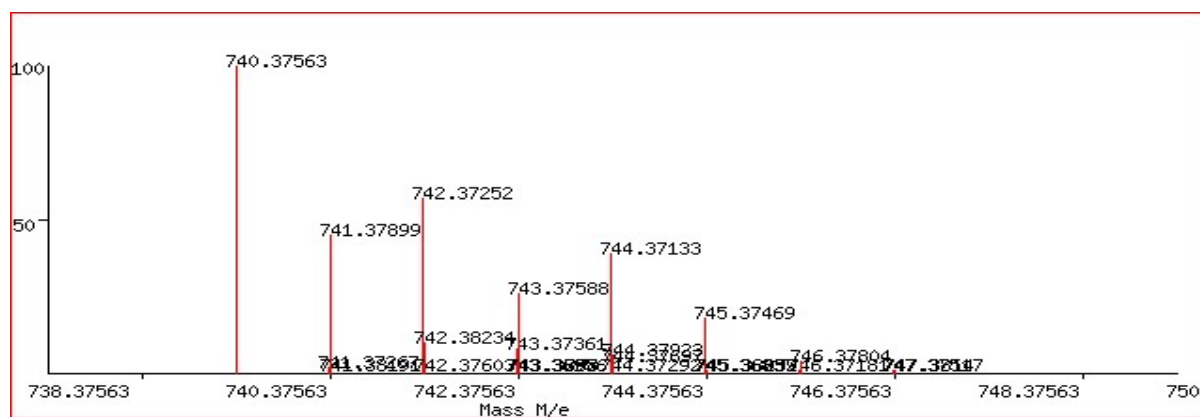

#### 4. $C_{21}H_{30}N_4O_5NiZn$ (MG+Zn complex)

$C_{21}H_{30}N_4NiO_5Zn$

Experimental exact mass: 540.4447 Theoretical exact mass: 540.0861

m/e: 540.0861 (100.0%), 542.0830 (57.4%), 544.0818 (38.6%), 542.0816 (38.5%), 541.0895 (22.7%), 544.0784 (22.1%), 546.0773 (14.9%), 543.0864 (13.0%), 545.0852 (8.8%), 543.0849 (8.7%), 543.0841 (8.4%), 544.0791 (5.3%), 545.0818 (5.0%), 547.0806 (3.4%), 545.0795 (3.2%), 546.0760 (3.1%), 542.0928 (2.5%), 548.0748 (2.1%), 544.0875 (1.9%), 543.0818 (1.7%), 541.0831 (1.5%), 544.0897 (1.4%), 546.0787 (1.4%), 546.0823 (1.3%), 545.0825 (1.2%), 542.0904 (1.0%)

(4a) Experimental Mass Spectrum of  $C_{21}H_{30}N_4O_5NiZn$  (**MG+Zn complex**)

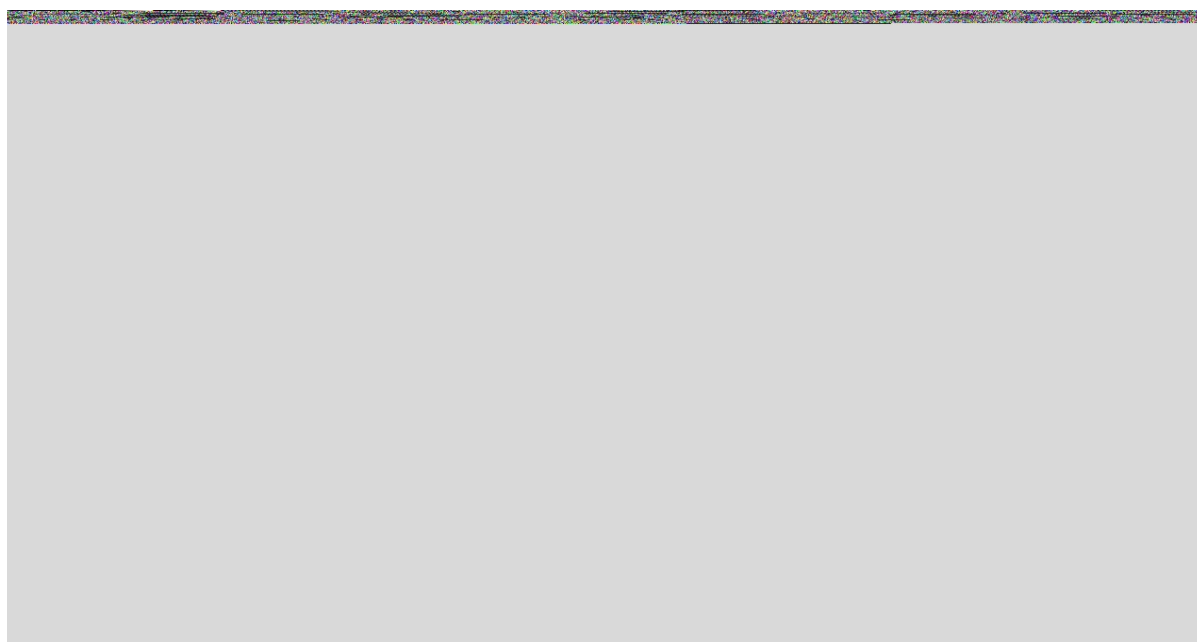

(4b) Theoretical Mass Spectrum of  $C_{21}H_{30}N_4O_5NiZn$  (**MG+Zn complex**) and isotopic distribution pattern

Low-resolution

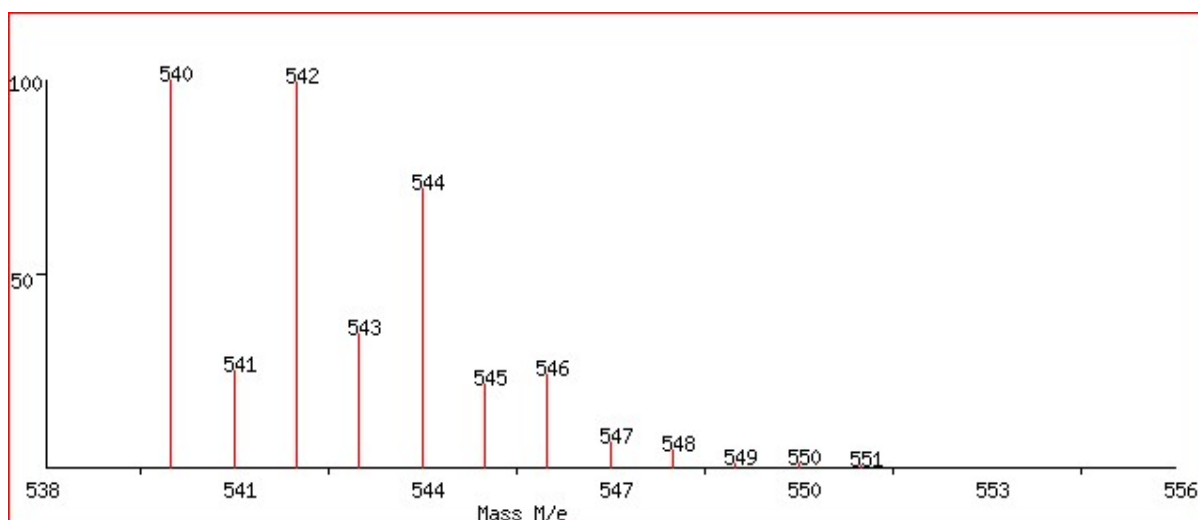

High-resolution

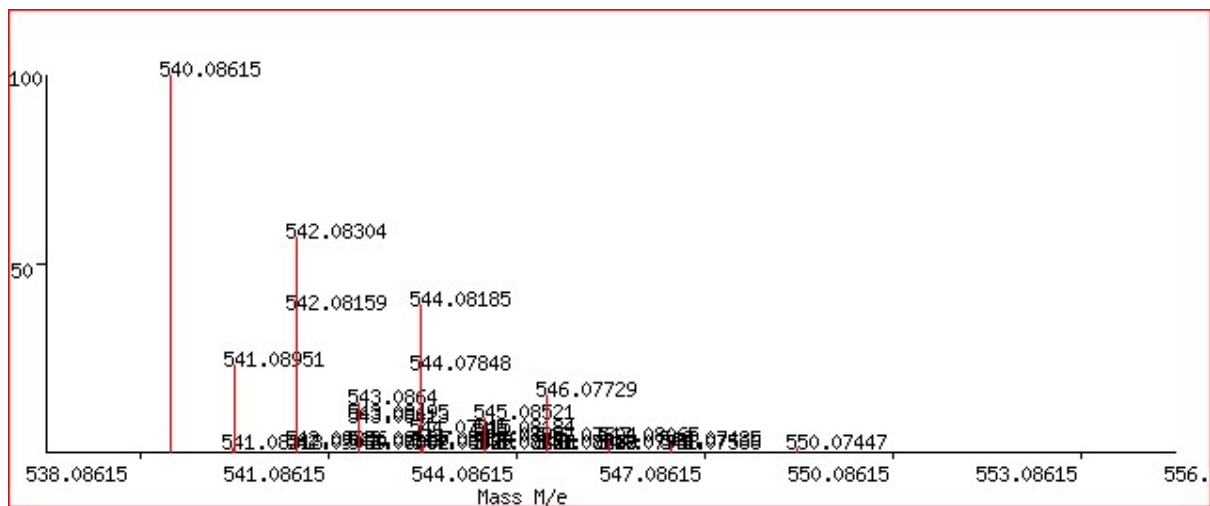

**Fig. S25** Experimental and Theoretical (low-resolution and High resolution) mass spectra of the compounds.

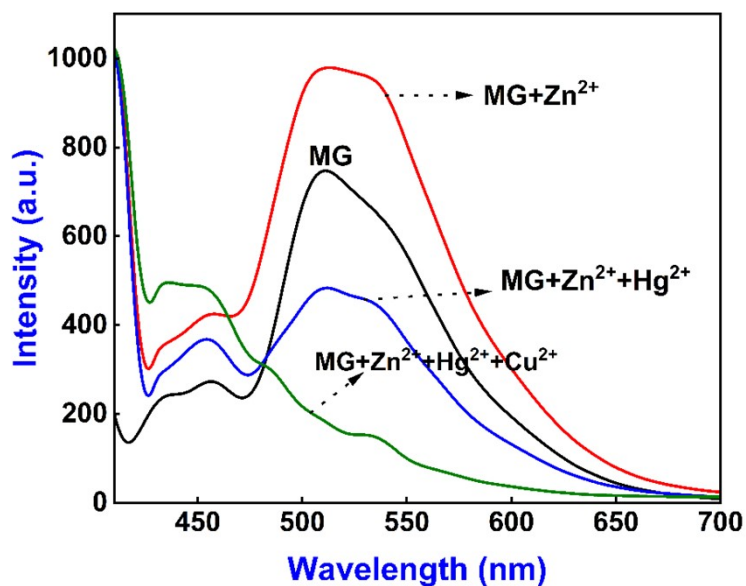

**Fig. S26** Reusability experiment plots of **MG** (10 μM, THF) with Zn<sup>2+</sup>, Cu<sup>2+</sup> and Hg<sup>2+</sup> (MeOH) after the treatment of **MG** + Zn<sup>2+</sup>/Cu<sup>2+</sup>/Hg<sup>2+</sup> product with EDTA (1.0 equiv) (slit width 7.5 nm).
